# Supplementary material for: Relationship between serum lipid level and colorectal cancer: a systemic review and meta-analysis
Source: HighWire-hosted journal article supplement (doi:10.1136/bmjopen-2021-052373), 2022-06-01
Supplement: bmjopen-2021-052373supp001_data_supplement.pdf [file bmjopen-2021-052373supp001_data_supplement.pdf]

**Supplementary Table S1.** Search strategy in the PubMed and Embase

| <b>PubMed</b> | <b>Search strategy</b>                                                                                                                                                                                                                                                                                                                                                                                                                                                                                                                                                                                                                                                                                                                                                                                                                                                                                                                                                                                                                                                                    |
|---------------|-------------------------------------------------------------------------------------------------------------------------------------------------------------------------------------------------------------------------------------------------------------------------------------------------------------------------------------------------------------------------------------------------------------------------------------------------------------------------------------------------------------------------------------------------------------------------------------------------------------------------------------------------------------------------------------------------------------------------------------------------------------------------------------------------------------------------------------------------------------------------------------------------------------------------------------------------------------------------------------------------------------------------------------------------------------------------------------------|
| #1            | "Lipids/blood"[Mesh] OR "Triglycerides"[Mesh] OR "Cholesterol"[Mesh]                                                                                                                                                                                                                                                                                                                                                                                                                                                                                                                                                                                                                                                                                                                                                                                                                                                                                                                                                                                                                      |
| #2            | "Triacylglycerol"[Title/Abstract] OR "Triacylglycerols"[Title/Abstract] OR "Epicholesterol"[Title/Abstract] OR "alpha Lipoprotein Cholesterol"[Title/Abstract] OR "Cholesterol alpha Lipoprotein"[Title/Abstract] OR "HDL Cholesterol"[Title/Abstract] OR "High Density Lipoprotein Cholesterol"[Title/Abstract] OR "Cholesterol HDL2"[Title/Abstract] OR "HDL2 Cholesterol"[Title/Abstract] OR "Cholesterol HDL3"[Title/Abstract] OR "HDL3 Cholesterol"[Title/Abstract] OR " Low Density Lipoprotein Cholesterol"[Title/Abstract] OR "beta Lipoprotein Cholesterol"[Title/Abstract] OR "Cholesterol beta Lipoprotein"[Title/Abstract] OR "LDL Cholesterol"[Title/Abstract] OR "Cholesteryl Linoleate LDL"[Title/Abstract] OR "LDL Cholesteryl Linoleate"[Title/Abstract] OR "lipids"[Title/Abstract] OR "serum lipid"[Title/Abstract] OR "Triglycerides"[Title/Abstract] OR "Triglyceride"[Title/Abstract] OR "Cholesterol"[Title/Abstract] OR "Total Cholesterol"[Title/Abstract] OR "TG"[Title/Abstract] OR "TC"[Title/Abstract] OR "HDL-C"[Title/Abstract] OR "LDL-C"[Title/Abstract] |
| #3            | #1 OR #2                                                                                                                                                                                                                                                                                                                                                                                                                                                                                                                                                                                                                                                                                                                                                                                                                                                                                                                                                                                                                                                                                  |
| #4            | "Colorectal Neoplasms"[Mesh]                                                                                                                                                                                                                                                                                                                                                                                                                                                                                                                                                                                                                                                                                                                                                                                                                                                                                                                                                                                                                                                              |
| #5            | "Colorectal Neoplasms"[Title/Abstract] OR "Colorectal Neoplasm"[Title/Abstract] OR "Neoplasm Colorectal"[Title/Abstract] OR "Colorectal Carcinoma"[Title/Abstract] OR "Carcinoma Colorectal"[Title/Abstract] OR "Carcinomas Colorectal"[Title/Abstract] OR "Colorectal Carcinomas"[Title/Abstract] OR "Colorectal Cancer"[Title/Abstract] OR "Cancer Colorectal"[Title/Abstract] OR "Cancers Colorectal"[Title/Abstract] OR "Colorectal Cancers"[Title/Abstract] OR "Colorectal Tumors"[Title/Abstract] OR "Colorectal Tumor"[Title/Abstract] OR "Tumor Colorectal"[Title/Abstract] OR "Tumors Colorectal"[Title/Abstract] OR "Neoplasms Colorectal"[Title/Abstract] OR "CRC"[Title/Abstract]                                                                                                                                                                                                                                                                                                                                                                                             |
| #6            | #4 OR #5                                                                                                                                                                                                                                                                                                                                                                                                                                                                                                                                                                                                                                                                                                                                                                                                                                                                                                                                                                                                                                                                                  |
| #7            | #3 AND #6                                                                                                                                                                                                                                                                                                                                                                                                                                                                                                                                                                                                                                                                                                                                                                                                                                                                                                                                                                                                                                                                                 |

| <b>Embase</b> | <b>Search strategy</b>                                                                                                                                                                                                                                                                                                                                                                                                                                                                                                                                                                                                                                                                                                                                                                                                     |
|---------------|----------------------------------------------------------------------------------------------------------------------------------------------------------------------------------------------------------------------------------------------------------------------------------------------------------------------------------------------------------------------------------------------------------------------------------------------------------------------------------------------------------------------------------------------------------------------------------------------------------------------------------------------------------------------------------------------------------------------------------------------------------------------------------------------------------------------------|
| #1            | lipid blood level/exp OR lipids:ab,ti OR serum lipid:ab,ti OR Triacylglycerol/exp OR Triacylglycerol:ab,ti OR Triacylglycerols:ab,ti OR Triglycerides:ab,ti OR Triglyceride:ab,ti OR Cholesterol/exp OR Epicholesterol:ab,ti OR alpha Lipoprotein Cholesterol:ab,ti OR Cholesterol alpha Lipoprotein:ab,ti OR HDL Cholesterol:ab,ti OR High Density Lipoprotein Cholesterol:ab,ti OR Cholesterol HDL2:ab,ti OR HDL2 Cholesterol:ab,ti OR Cholesterol HDL3:ab,ti OR HDL3 Cholesterol:ab,ti OR Low Density Lipoprotein Cholesterol:ab,ti OR beta Lipoprotein Cholesterol:ab,ti OR Cholesterol beta Lipoprotein:ab, ti OR LDL Cholesterol:ab,ti OR Cholesteryl Linoleate LDL:ab,ti OR LDL Cholesteryl Linoleate:ab,ti OR Cholesterol:ab,ti OR Total Cholesterol:ab,ti OR TG:ab,ti OR TC:ab,ti OR HDL -C:ab,ti OR LDL -C:ab,ti |
| #2            | colorectal tumor/exp OR Colorectal Neoplasms:ab,ti OR Colorectal Neoplasm:ab,ti OR Neoplasm Colorectal:ab,ti OR Colorectal Carcinoma:ab,ti OR Carcinoma Colorectal:ab,ti OR Carcinomas Colorectal:ab,ti OR Colorectal Carcinomas:ab,ti OR Colorectal Cancer:ab,ti OR Ca ncer Colorectal:ab,ti OR Cancers Colorectal:ab,ti OR Colorectal Cancers:ab,ti OR Colorectal Tumors:ab,ti OR Colorectal Tumor:ab,ti OR Tumor Colorectal:ab,ti OR Tumors Colorectal:ab,ti OR Neoplasms Colorectal:ab,ti OR CRC:ab,ti                                                                                                                                                                                                                                                                                                                 |
| #3            | #1 AND #2                                                                                                                                                                                                                                                                                                                                                                                                                                                                                                                                                                                                                                                                                                                                                                                                                  |

**Supplementary Table S2.** Characteristics of included prospective studies of serum lipids and colorectal cancer risk

| First author, publication year (reference), Country, Type | Cases/subject (age), duration of follow up | Exposure categories                                                                                                | RR/HR (95%CI)                                            | Matched/Adjusted potential factors                                                                                                                                                                                                                                                                                                                                                                                                                                                                                                                                                                                     |
|-----------------------------------------------------------|--------------------------------------------|--------------------------------------------------------------------------------------------------------------------|----------------------------------------------------------|------------------------------------------------------------------------------------------------------------------------------------------------------------------------------------------------------------------------------------------------------------------------------------------------------------------------------------------------------------------------------------------------------------------------------------------------------------------------------------------------------------------------------------------------------------------------------------------------------------------------|
| Li et al[16]*, 2019, China, CS                            | 394/104,333 (mean, 51.2y), 10y             | Men:<br>Triglycerides $\geq 1.7$ vs. $< 1.7$ mmol/l (CRC)<br>HDL cholesterol $\geq 1.03$ vs. $< 1.03$ mmol/l (CRC) | 1.12 (0.90–1.41)<br>0.81 (0.54–1.19)                     | Age, education level, income status, frequency of tobacco smoking, frequency of alcohol drinking, and sitting time                                                                                                                                                                                                                                                                                                                                                                                                                                                                                                     |
| Katzke et al[17], 2017, Germany, C-CS                     | 256/25,546 (35-65y), 18y                   | All:<br>Triglycerides Q4 vs. Q1 (CRC)<br>Total cholesterol Q4 vs. Q1 (CRC)<br>HDL cholesterol Q4 vs. Q1 (CRC)      | 1.17 (0.74-1.84)<br>1.30 (0.84-2.01)<br>1.12 (0.73-1.73) | Age, sex, baseline height, waist, BMI, lifetime alcohol consumption, red meat intake, fibre intake, smoking status, socioeconomic status, physical activity, diabetes, hypertension and use of lipid lowering drugs                                                                                                                                                                                                                                                                                                                                                                                                    |
| Muka et al[24], 2016, Netherlands, CS                     | 248/6,628 (mean, 69.6y), 22y               | All:<br>Total cholesterol 262.55-694.98 vs. 84.94-239.38 mg/dl (CRC)                                               | 1.49 (1.08-2.06)                                         | Age, sex, total energy intake, polyunsaturated fatty acids intake, Dutch Healthy Diet index excluding fish and polyunsaturated fatty acids component, processed red meat, unprocessed red meat, dietary fish intake, calcium intake, alcohol intake, physical activity, smoking status, BMI, waist-to-hip ratio, education level, income level, diabetes mellitus, family history of diabetes mellitus, family history of cardiovascular diseases, family history of cancer, history of gallbladder operations, anti-inflammatory and antirheumatic drugs, hormone replacement therapy, lipid lowering mediation drugs |

*(Continued)*

**Supplementary Table S2 (Continued)**

| <b>First author, publication year (reference), Country, Type</b> | <b>Cases/subject (age), duration of follow up</b> | <b>Exposure categories</b>                                                                                                                                                          | <b>RR/HR (95%CI)</b>                                                         | <b>Matched/Adjusted potential factors</b>                                                                                                                                                                                                                                                     |
|------------------------------------------------------------------|---------------------------------------------------|-------------------------------------------------------------------------------------------------------------------------------------------------------------------------------------|------------------------------------------------------------------------------|-----------------------------------------------------------------------------------------------------------------------------------------------------------------------------------------------------------------------------------------------------------------------------------------------|
| Chandler et al[11], 2016, USA, CS                                | 198/15,602 ( $\geq 45$ y), 21y                    | Women:<br>Triglycerides Q4 vs. Q1 (CRC)<br>Total cholesterol Q4 vs. Q1 (CRC)<br>HDL cholesterol Q4 vs. Q1 (CRC)<br>LDL cholesterol Q4 vs. Q1 (CRC)                                  | 1.86 (1.17-2.97)<br>1.21 (0.80-1.84)<br>0.63 (0.41-0.98)<br>1.14 (0.77-1.68) | Age, race, treatment random assignment, hormone replacement therapy, cigarette smoking, exercise, alcohol consumption, postmenopausal status, family history of cancer, aspirin use, history of colon polyps, total vegetable and fruit intake, history of mammogram, red meat intake and BMI |
| Lu et al[12]*, 2015, Norway, CS                                  | 2,044/143,477 (mean, 50.9y), 15y                  | All:<br>Triglycerides $\geq 1.7$ vs. $< 1.7$ mmol/l (CRC)<br>HDL cholesterol $\geq 1.03$ (male) and $\geq 1.29$ (women) vs. $< 1.03$ (male) and $< 1.29$ (women) mmol/l (CRC)       | 1.12 (1.02-1.22)<br>0.93 (0.85-1.03)                                         | Age, sex, smoking, alcohol consumption, physical activity, education, family history of cancer, and BMI                                                                                                                                                                                       |
| Shin et al [25], 2014, Korea, CS                                 | 9,147/1,326,058 (30-80y), 11y                     | Men:<br>Total cholesterol $\geq 240$ vs. $\leq 200$ mg/dl (CRC)<br>Total cholesterol $\geq 240$ vs. $\leq 200$ mg/dl (CC)<br>Total cholesterol $\geq 240$ vs. $\leq 200$ mg/dl (RC) | 1.16 (1.08-1.26)<br>1.09 (0.97-1.23)<br>1.25 (1.12-1.40)                     | Age                                                                                                                                                                                                                                                                                           |

*(Continued)*

**Supplementary Table S2 (Continued)**

| First author, publication year (reference), Country, Type | Cases/subject (age), duration of follow up | Exposure categories | RR/HR (95%CI)                              | Matched/Adjusted potential factors |                                                                                                                                                                                       |
|-----------------------------------------------------------|--------------------------------------------|---------------------|--------------------------------------------|------------------------------------|---------------------------------------------------------------------------------------------------------------------------------------------------------------------------------------|
| Agnoli et al [18], 2014, Italy, C-CS                      | 286/850 (N/A), 15y                         | All:                |                                            |                                    | Age, gender, BMI, smoking, total physical activity, alcohol consumption, dietary red meat, dietary fiber, and dietary calcium, and menopause status (for women); stratified by center |
|                                                           |                                            | Triglycerides       | 138.84-1124.07 vs. 32.04-89.44 mg/dl (CRC) | 1.32 (0.89-1.95)                   |                                                                                                                                                                                       |
|                                                           |                                            | Total cholesterol   | 246.19-417.46 vs. 72.25-204.71 mg/dl (CRC) | 1.66 (1.12-2.45)                   |                                                                                                                                                                                       |
|                                                           |                                            | HDL cholesterol     | 68.54-129.02 vs. 24.19-55.10 mg/dl (CRC)   | 0.85 (0.56-1.28)                   |                                                                                                                                                                                       |
|                                                           |                                            | LDL cholesterol     | 155.17-290.27 vs. 24.10-121.53 mg/dl (CRC) | 1.87 (1.27-2.76)                   |                                                                                                                                                                                       |
|                                                           |                                            | Men:                |                                            |                                    |                                                                                                                                                                                       |
|                                                           |                                            | Triglycerides       | 138.84-1124.07 vs. 32.04-89.44 mg/dl (CRC) | 1.77 (0.88-3.55)                   |                                                                                                                                                                                       |
|                                                           |                                            | Total cholesterol   | 246.19-417.46 vs. 72.25-204.71 mg/dl (CRC) | 2.54 (1.35-4.79)                   |                                                                                                                                                                                       |
|                                                           |                                            | HDL cholesterol     | 68.54-129.02 vs. 24.19-55.10 mg/dl (CRC)   | 0.69 (0.30-1.59)                   |                                                                                                                                                                                       |
|                                                           |                                            | LDL cholesterol     | 155.17-290.27 vs. 24.10-121.53 mg/dl (CRC) | 2.90 (1.51-5.56)                   |                                                                                                                                                                                       |
|                                                           |                                            | Women               |                                            |                                    |                                                                                                                                                                                       |
|                                                           |                                            | Triglycerides       | 138.84-1124.07 vs. 32.04-89.44 mg/dl (CRC) | 1.12 (0.66-1.89)                   |                                                                                                                                                                                       |
| Total cholesterol                                         | 246.19-417.46 vs. 72.25-204.71 mg/dl (CRC) | 1.41 (0.83-2.39)    |                                            |                                    |                                                                                                                                                                                       |
| HDL cholesterol                                           | 68.54-129.02 vs. 24.19-55.10 mg/dl (CRC)   | 0.87 (0.52-1.47)    |                                            |                                    |                                                                                                                                                                                       |
| LDL cholesterol                                           | 155.17-290.27 vs. 24.10-121.53 mg/dl (CRC) | 1.65 (0.97-2.78)    |                                            |                                    |                                                                                                                                                                                       |
| Strohmaier et al [37], 2013, European, CS                 | 4,935/577,330 (mean, 44y), 11.7y           | Men:                |                                            |                                    | Age, BMI, smoking status, and stratified by cohort, fasting status, and birth year                                                                                                    |
|                                                           |                                            | Total cholesterol   | Q5 vs. Q1 (CC)                             | 1.18 (0.92-1.51)                   |                                                                                                                                                                                       |
|                                                           |                                            | Total cholesterol   | Q5 vs. Q1 (RC)                             | 1.09 (0.81-1.48)                   |                                                                                                                                                                                       |
|                                                           |                                            | Women:              |                                            |                                    |                                                                                                                                                                                       |
|                                                           |                                            | Total cholesterol   | Q5 vs. Q1 (CC)                             | 1.23 (0.90-1.69)                   |                                                                                                                                                                                       |
|                                                           |                                            | Total cholesterol   | Q5 vs. Q1 (RC)                             | 1.48 (0.94-2.32)                   |                                                                                                                                                                                       |

*(Continued)*

**Supplementary Table S2 (Continued)**

| First author, publication year (reference), Country, Type | Cases/subject (age), duration of follow up | Exposure categories                                      | RR/HR (95%CI)    | Matched/Adjusted potential factors                                                                                                                                                                                                                           |
|-----------------------------------------------------------|--------------------------------------------|----------------------------------------------------------|------------------|--------------------------------------------------------------------------------------------------------------------------------------------------------------------------------------------------------------------------------------------------------------|
| Borena et al [13], 2011, European, CS                     | 4,984/514,097 (mean, 44y), 12.7y           | Men:                                                     |                  |                                                                                                                                                                                                                                                              |
|                                                           |                                            | Triglycerides Q5 vs. Q1 (CC)                             | 1.96 (1.44-2.67) | Age, BMI, smoking status, and stratified by cohort, fasting status, and birth year                                                                                                                                                                           |
|                                                           |                                            | Triglycerides Q5 vs. Q1 (RC)                             | 1.26 (0.85-1.85) |                                                                                                                                                                                                                                                              |
|                                                           |                                            | Women:                                                   |                  |                                                                                                                                                                                                                                                              |
|                                                           |                                            | Triglycerides Q5 vs. Q1 (CC)                             | 1.05 (0.75-1.47) |                                                                                                                                                                                                                                                              |
|                                                           |                                            | Triglycerides Q5 vs. Q1 (RC)                             | 1.33 (0.84-2.13) |                                                                                                                                                                                                                                                              |
| Van Duijnhoven et al [19], 2011, European, NC-CS          | 1,238/2,476 (mean, 59.0/59.1y), 5.5y       | All:                                                     |                  | Age, sex, centre, follow-up time, time of blood collection, fasting status, height, weight, smoking habits, physical activity, education, consumption of fruit, vegetables, meat, fish and alcohol, intake of fibre, energy from fat and energy from non-fat |
|                                                           |                                            | Triglycerides $\geq 201.9$ vs. $< 79.7$ mg/dl (CRC)      | 1.19 (0.84-1.69) |                                                                                                                                                                                                                                                              |
|                                                           |                                            | Triglycerides $\geq 201.9$ vs. $< 79.7$ mg/dl (CC)       | 1.42 (0.91-2.31) |                                                                                                                                                                                                                                                              |
|                                                           |                                            | Triglycerides $\geq 201.9$ vs. $< 79.7$ mg/dl (RC)       | 1.06 (0.60-1.88) |                                                                                                                                                                                                                                                              |
|                                                           |                                            | Total cholesterol $\geq 287.7$ vs. $< 211.5$ mg/dl (CRC) | 0.68 (0.50-0.92) |                                                                                                                                                                                                                                                              |
|                                                           |                                            | Total cholesterol $\geq 287.7$ vs. $< 211.5$ mg/dl (CC)  | 0.66 (0.45-0.98) |                                                                                                                                                                                                                                                              |
|                                                           |                                            | Total cholesterol $\geq 287.7$ vs. $< 211.5$ mg/dl (RC)  | 0.68 (0.41-1.13) |                                                                                                                                                                                                                                                              |
|                                                           |                                            | HDL cholesterol $\geq 70.4$ vs. $< 43.3$ mg/dl (CRC)     | 0.54 (0.39-0.77) |                                                                                                                                                                                                                                                              |
|                                                           |                                            | HDL cholesterol $\geq 70.4$ vs. $< 43.3$ mg/dl (CC)      | 0.42 (0.28-0.65) |                                                                                                                                                                                                                                                              |
|                                                           |                                            | HDL cholesterol $\geq 70.4$ vs. $< 43.3$ mg/dl (RC)      | 0.79 (0.42-1.49) |                                                                                                                                                                                                                                                              |
|                                                           |                                            | LDL cholesterol $\geq 201.5$ vs. $< 131.9$ mg/dl (CRC)   | 0.73 (0.54-0.99) |                                                                                                                                                                                                                                                              |
| LDL cholesterol $\geq 201.5$ vs. $< 131.9$ mg/dl (CC)     | 0.72 (0.48-1.08)                           |                                                          |                  |                                                                                                                                                                                                                                                              |
| LDL cholesterol $\geq 201.5$ vs. $< 131.9$ mg/dl (RC)     | 0.79 (0.48-1.29)                           |                                                          |                  |                                                                                                                                                                                                                                                              |

*(Continued)*

**Supplementary Table S2 (Continued)**

| First author, publication year (reference), Country, Type | Cases/subject (age), duration of follow up                  | Exposure categories                                 | RR/HR (95%CI)    | Matched/Adjusted potential factors |                                                                                                           |
|-----------------------------------------------------------|-------------------------------------------------------------|-----------------------------------------------------|------------------|------------------------------------|-----------------------------------------------------------------------------------------------------------|
| Kitahara et al [26], 2011, Korea, CS                      | 1314/1,189,719 (mean, 44.9y for men/49.3y for women), 12.7y | Men:                                                |                  |                                    | Age, cigarette smoking, alcohol drinking, BMI, fasting serum glucose, hypertension, and physical activity |
|                                                           |                                                             | Total cholesterol $\geq 240$ vs. $< 160$ mg/dl (CC) | 1.12 (1.00-1.25) |                                    |                                                                                                           |
|                                                           |                                                             | Total cholesterol $\geq 240$ vs. $< 160$ mg/dl (RC) | 1.06 (0.94-1.19) |                                    |                                                                                                           |
|                                                           |                                                             | Women:                                              |                  |                                    |                                                                                                           |
|                                                           |                                                             | Total cholesterol $\geq 240$ vs. $< 160$ mg/dl (CC) | 1.14 (0.96-1.35) |                                    |                                                                                                           |
|                                                           |                                                             | Total cholesterol $\geq 240$ vs. $< 160$ mg/dl (RC) | 1.13 (0.94-1.36) |                                    |                                                                                                           |
| Inoue et al [14], 2009, Japan, CS                         | 312/27,724 (40-69y), 10.2y                                  | Men:                                                |                  |                                    | Age, study area, smoking status, weekly ethanol intake, and total serum cholesterol                       |
|                                                           |                                                             | Triglycerides $\geq 150$ vs. $< 150$ mg/dl (CC)     | 1.71 (1.11-2.62) |                                    |                                                                                                           |
|                                                           |                                                             | Triglycerides $\geq 150$ vs. $< 150$ mg/dl (RC)     | 0.54 (0.26-1.11) |                                    |                                                                                                           |
|                                                           |                                                             | HDL cholesterol $\geq 40$ vs. $< 40$ mg/dl (CC)     | 1.15 (0.65-2.03) |                                    |                                                                                                           |
|                                                           |                                                             | HDL cholesterol $\geq 40$ vs. $< 40$ mg/dl (RC)     | 0.41 (0.14-1.16) |                                    |                                                                                                           |
|                                                           |                                                             | Women:                                              |                  |                                    |                                                                                                           |
|                                                           |                                                             | Triglycerides $\geq 150$ vs. $< 150$ mg/dl (CC)     | 1.00 (0.63-1.60) |                                    |                                                                                                           |
|                                                           |                                                             | Triglycerides $\geq 150$ vs. $< 150$ mg/dl (RC)     | 0.52 (0.24-1.13) |                                    |                                                                                                           |
|                                                           |                                                             | HDL cholesterol $\geq 50$ vs. $< 50$ mg/dl (CC)     | 1.12 (0.74-1.71) |                                    |                                                                                                           |
|                                                           |                                                             | HDL cholesterol $\geq 50$ vs. $< 50$ mg/dl (RC)     | 1.14 (0.63-2.06) |                                    |                                                                                                           |

*(Continued)*

**Supplementary Table S2 (Continued)**

| First author, publication year (reference), Country, Type | Cases/subject (age), duration of follow up | Exposure categories                                   | RR/HR (95%CI)    | Matched/Adjusted potential factors |                                                                                                                                                                                                                                                                                            |
|-----------------------------------------------------------|--------------------------------------------|-------------------------------------------------------|------------------|------------------------------------|--------------------------------------------------------------------------------------------------------------------------------------------------------------------------------------------------------------------------------------------------------------------------------------------|
| Iso et al [38]*, 2009, Japan, CS                          | 320/33,368 (40-69y), 12.4y                 | Men:                                                  |                  |                                    | Age, BMI, pack year of smoking, ethanol intake, hypertension, diabetes, hyperlipidemia medication use, total vegetable intake, coffee intake and public health center                                                                                                                      |
|                                                           |                                            | Total cholesterol $\geq 240$ vs. $< 160$ mg/dl (CRC)  | 1.10 (0.67-1.80) |                                    |                                                                                                                                                                                                                                                                                            |
|                                                           |                                            | Total cholesterol $\geq 240$ vs. $< 160$ mg/dl (CC)   | 1.21 (0.68-2.14) |                                    |                                                                                                                                                                                                                                                                                            |
|                                                           |                                            | Total cholesterol $\geq 240$ vs. $< 160$ mg/dl (RC)   | 0.90 (0.36-2.27) |                                    |                                                                                                                                                                                                                                                                                            |
|                                                           |                                            | Women:                                                |                  |                                    |                                                                                                                                                                                                                                                                                            |
|                                                           |                                            | Total cholesterol $\geq 240$ vs. $< 160$ mg/dl (CRC)  | 1.64 (0.89-3.05) |                                    |                                                                                                                                                                                                                                                                                            |
|                                                           |                                            | Total cholesterol $\geq 240$ vs. $< 160$ mg/dl (CC)   | 1.83 (0.85-3.93) |                                    |                                                                                                                                                                                                                                                                                            |
|                                                           |                                            | Total cholesterol $\geq 240$ vs. $< 160$ mg/dl (RC)   | 1.36 (0.49-3.79) |                                    |                                                                                                                                                                                                                                                                                            |
| Ahn et al [28], 2009, Finland, CS                         | 507/29,093 (50-69y), 18y                   | Men:                                                  |                  |                                    | Age, intervention, level of education, systolic blood pressure, BMI, physical activity, duration of smoking, number of cigarettes smoked per day, saturates fat intake, polyunsaturated fat intake, total calorie, alcohol consumption, and serum total and HDL cholesterol for each other |
|                                                           |                                            | Total cholesterol $> 276.7$ vs. $< 203.9$ mg/dl (CRC) | 0.86 (0.65-1.13) |                                    |                                                                                                                                                                                                                                                                                            |
|                                                           |                                            | HDL cholesterol $> 55.3$ vs. $< 36.2$ mg/dl (CRC)     | 1.01 (0.76-1.35) |                                    |                                                                                                                                                                                                                                                                                            |
| Ahmed et al [20]*, 2006, USA, CS                          | 194/14,109 (45-64y), 11.5y                 | All:                                                  |                  |                                    | Age, gender, family history of colorectal cancer, physical activity, non-steroidal anti-inflammatory drug use, NSAID use, aspirin use, pack-years of cigarette use, and grams of alcohol per week. Also adjusted for hormone-replacement therapy in women                                  |
|                                                           |                                            | Triglycerides $\geq 150$ vs. $< 150$ mg/dl (CRC)      | 1.08 (0.8-1.5)   |                                    |                                                                                                                                                                                                                                                                                            |
|                                                           |                                            | HDL cholesterol High vs. Low (CRC)                    | 0.84 (0.63-1.12) |                                    |                                                                                                                                                                                                                                                                                            |

*(Continued)*



**Supplementary Table S2 (Continued)**

| <b>First author, publication year (reference), Country, Type</b> | <b>Cases/subject (age), duration of follow up</b> | <b>Exposure categories</b>                                                                                                                                 | <b>RR/HR (95%CI)</b>                                                         | <b>Matched/Adjusted potential factors</b>                                                                                                                                         |
|------------------------------------------------------------------|---------------------------------------------------|------------------------------------------------------------------------------------------------------------------------------------------------------------|------------------------------------------------------------------------------|-----------------------------------------------------------------------------------------------------------------------------------------------------------------------------------|
| Tsushima et al [21], 2005, USA, CS                               | 504/7619 (45-65y), 31y                            | Men:<br>Triglycerides Q4 vs. Q1 (CRC)<br>Triglycerides Q4 vs. Q1 (CC)<br>Triglycerides Q4 vs. Q1 (RC)                                                      | 1.01 (0.77-1.33)<br>0.92 (0.67-1.26)<br>1.28 (0.75-2.18)                     | Age, elapsed time since last caloric intake, elapsed time since 50-g glucose load, BMI, heart rate, cigarette smoking history, alcohol intake, and 24-hr intake of total calories |
| Saydah et al [22], 2003, USA, NC-CS                              | 173/519 (≥18y), 12y                               | All:<br>Triglycerides Q4 vs. Q1 (CRC)                                                                                                                      | 0.69 (0.41-1.16)                                                             | Age, sex, race, time since last meal, and date of blood draw                                                                                                                      |
| Schoen et al [23], 1999, USA, CS                                 | 102/5849 (≥65y), 6.4y                             | All:<br>Triglycerides Q4 vs. Q1 (CRC)<br>HDL cholesterol Q4 vs. Q1 (CRC)<br>LDL cholesterol Q4 vs. Q1 (CRC)                                                | 1.4 (0.8-2.5)<br>0.6 (0.3-1.2)<br>0.5 (0.3-0.9)                              | Age, sex, and physical activity                                                                                                                                                   |
| Tulinius et al [15]**, 1997, Iceland, CS                         | 338/22,946 (mean, 50.4y), 27y                     | Men:<br>Triglycerides T3 vs. T1 (CRC)<br>Total cholesterol T3 vs. T1 (CRC)<br>Women:<br>Triglycerides T3 vs. T1 (CRC)<br>Total cholesterol T3 vs. T1 (CRC) | 1.39 (1.13-1.71)<br>1.32 (1.07-1.62)<br>1.35 (1.06-1.72)<br>1.33 (1.05-1.70) | Age                                                                                                                                                                               |

*(Continued)*

**Supplementary Table S2 (Continued)**

| First author, publication year (reference), Country, Type | Cases/subject (age), duration of follow up | Exposure categories                                         | RR/HR (95%CI)    | Matched/Adjusted potential factors |                                                                                                                                                                             |
|-----------------------------------------------------------|--------------------------------------------|-------------------------------------------------------------|------------------|------------------------------------|-----------------------------------------------------------------------------------------------------------------------------------------------------------------------------|
| Gaard et al [29], 1997, Norway, CS                        | 338/62,173 (20-49y), 14y                   | Men:                                                        |                  |                                    | Age and attained age, BMI, height, smoking status, and menopausal status                                                                                                    |
|                                                           |                                            | HDL cholesterol $\geq 1.66$ vs. $\leq 1.19$ mmol/L (CC)     | 0.99 (0.58-1.68) |                                    |                                                                                                                                                                             |
|                                                           |                                            | HDL cholesterol $\geq 1.66$ vs. $\leq 1.19$ mmol/L (RC)     | 0.87 (0.41-1.86) |                                    |                                                                                                                                                                             |
|                                                           |                                            | LDL cholesterol $\geq 4.65$ vs. $\leq 3.17$ mmol/L (CC)     | 0.99 (0.56-1.74) |                                    |                                                                                                                                                                             |
|                                                           |                                            | LDL cholesterol $\geq 4.65$ vs. $\leq 3.17$ mmol/L (RC)     | 1.17 (0.52-2.64) |                                    |                                                                                                                                                                             |
|                                                           |                                            | Women:                                                      |                  |                                    |                                                                                                                                                                             |
|                                                           |                                            | HDL cholesterol $\geq 1.66$ vs. $\leq 1.19$ mmol/L (CC)     | 1.23 (0.61-2.45) |                                    |                                                                                                                                                                             |
|                                                           |                                            | HDL cholesterol $\geq 1.66$ vs. $\leq 1.19$ mmol/L (RC)     | 0.73 (0.35-1.53) |                                    |                                                                                                                                                                             |
| Chyou et al [34], 1996, USA, CS                           | 453/7945 (45-65y), 28y                     | Men:                                                        |                  |                                    | Age                                                                                                                                                                         |
|                                                           |                                            | Total cholesterol $\geq 240$ vs. $< 200$ mg/dl (CC)         | 0.74 (0.56-0.97) |                                    |                                                                                                                                                                             |
|                                                           |                                            | Total cholesterol $\geq 240$ vs. $< 200$ mg/dl (RC)         | 1.10 (0.68-1.79) |                                    |                                                                                                                                                                             |
| Schatzkin et al [35]*, 1988, USA, CS                      | 130/12,488 (25-74y), 10y                   | Men:                                                        |                  |                                    | Age, education, BMI, smoking, alcohol, fat as a percentage of calories, dietary fiber, age at first birth (women), age at menarche (women), parity (women), and cholesterol |
|                                                           |                                            | Total cholesterol $\geq 246$ vs. $\leq 189$ mg/dl (CRC)     | 0.59 (0.27-1.27) |                                    |                                                                                                                                                                             |
|                                                           |                                            | Women:<br>Total cholesterol $> 252$ vs. $< 186$ mg/dl (CRC) | 1.00 (0.33-3.00) |                                    |                                                                                                                                                                             |

*(Continued)*

**Supplementary Table S2 (Continued)**

| <b>First author, publication year (reference), Country, Type</b> | <b>Cases/subject (age), duration of follow up</b> | <b>Exposure categories</b>                 | <b>RR/HR (95%CI)</b> | <b>Matched/Adjusted potential factors</b>                    |     |
|------------------------------------------------------------------|---------------------------------------------------|--------------------------------------------|----------------------|--------------------------------------------------------------|-----|
| Tomberg et al [27], 1986, Sweden, CS                             | 839/92,898 (≤75y), 16y                            | Men:                                       |                      |                                                              | Age |
|                                                                  |                                                   | Total cholesterol ≥276 vs. ≤224 mg/dl (CC) | 1.17 (0.81-1.68)     |                                                              |     |
|                                                                  |                                                   | Total cholesterol ≥276 vs. ≤224 mg/dl (RC) | 1.65 (1.05-2.57)     |                                                              |     |
|                                                                  |                                                   | Women:                                     |                      |                                                              |     |
|                                                                  |                                                   | Total cholesterol ≥276 vs. ≤224 mg/dl (CC) | 1.23 (0.84-1.81)     |                                                              |     |
|                                                                  |                                                   | Total cholesterol ≥276 vs. ≤224 mg/dl (RC) | 1.23 (0.64-2.34)     |                                                              |     |
| Sidney et al [36], 1986, USA, NC-CS                              | 245/1,470 (mean, 64.6y), 14y                      | All:<br>Total cholesterol Q4 vs. Q1 (CRC)  | 1.2 (0.8 -1.8)       | Age, sex, race, and multiphasic checkup at the same facility |     |

BMI: body mass index; CC: colon cancer; C-CS: case-control study; CI: confidence interval; CRC: colorectal cancer; CS: cohort study; HDL: high density lipoprotein; HR: hazards ratio; LDL: low density lipoprotein; NC-CS: nested case-control study; N/A: not available; RC: rectal cancer; RR: relative risk.

\* Recalculate the RR by the method proposed by Hamling et al.

\*\* Recalculate the RR by the method proposed by Xu et al.

**Supplementary Table S3.** Study quality scores of prospective studies included in the meta-analysis

| First author,<br>publication year<br>[reference] | Representativeness<br>of the exposed<br>cohort | Selection<br>of the<br>unexposed<br>cohort | Ascertainment<br>of exposure | Outcome of<br>interest<br>not present<br>at start of study | Control for<br>important factor<br>or additional<br>factor* | Assessment<br>of outcome | Follow-up<br>long<br>enough for<br>outcomes<br>to occur** | Adequacy<br>of<br>follow-up<br>of<br>cohorts*** | Total<br>quality<br>scores |
|--------------------------------------------------|------------------------------------------------|--------------------------------------------|------------------------------|------------------------------------------------------------|-------------------------------------------------------------|--------------------------|-----------------------------------------------------------|-------------------------------------------------|----------------------------|
| Li [16], 2019                                    | ★                                              | ★                                          | ★                            | ★                                                          | ★                                                           | ★                        | ★                                                         | ★                                               | 9                          |
| Katzke [17], 2017                                | ★                                              | ★                                          | ★                            | ★                                                          | ★★                                                          | ★                        | ★                                                         | ★                                               | 9                          |
| Chandler [11], 2016                              | ★                                              | ★                                          | ★                            | ★                                                          | ★★                                                          | ★                        | ★                                                         | ★                                               | 9                          |
| Muka [24], 2016                                  | ★                                              | ★                                          | ★                            | ★                                                          | ★★                                                          | ★                        | ★                                                         | ★                                               | 9                          |
| Lu [12], 2015                                    | ★                                              | ★                                          | ★                            | ★                                                          | ★★                                                          | ★                        | ★                                                         | ★                                               | 9                          |
| Agnoli [18], 2014                                | ★                                              | ★                                          | ★                            | ★                                                          | ★★                                                          | ★                        | ★                                                         | ★                                               | 9                          |
| Shin [25], 2014                                  | ★                                              | ★                                          | ★                            | ★                                                          | ★                                                           | ★                        | ★                                                         | —                                               | 8                          |
| Strohmaier [37], 2013                            | ★                                              | ★                                          | ★                            | ★                                                          | ★★                                                          | ★                        | ★                                                         | ★                                               | 9                          |
| Van Duijnhoven [19], 2011                        | ★                                              | ★                                          | ★                            | ★                                                          | ★★                                                          | ★                        | —                                                         | ★                                               | 8                          |
| Borena [13], 2011                                | ★                                              | ★                                          | ★                            | ★                                                          | ★★                                                          | ★                        | ★                                                         | ★                                               | 9                          |
| Kitahara [26], 2011                              | ★                                              | ★                                          | —                            | ★                                                          | ★★                                                          | ★                        | ★                                                         | ★                                               | 8                          |
| Inoue [14], 2009                                 | ★                                              | ★                                          | ★                            | ★                                                          | ★                                                           | ★                        | ★                                                         | ★                                               | 8                          |
| Iso [38], 2009                                   | ★                                              | ★                                          | ★                            | ★                                                          | ★★                                                          | ★                        | ★                                                         | ★                                               | 9                          |
| Ahn [28], 2009                                   | ★                                              | ★                                          | ★                            | ★                                                          | ★★                                                          | ★                        | ★                                                         | ★                                               | 9                          |
| Ahmed [20], 2006                                 | ★                                              | ★                                          | ★                            | ★                                                          | ★                                                           | ★                        | ★                                                         | ★                                               | 8                          |
| Tsushima [21], 2005                              | ★                                              | ★                                          | ★                            | ★                                                          | ★★                                                          | ★                        | ★                                                         | ★                                               | 9                          |
| Saydah [22], 2003                                | ★                                              | ★                                          | ★                            | ★                                                          | —                                                           | ★                        | ★                                                         | ★                                               | 7                          |
| Schoen [23], 1999                                | ★                                              | ★                                          | ★                            | ★                                                          | —                                                           | ★                        | —                                                         | ★                                               | 6                          |
| Tulinius [15], 1997                              | ★                                              | ★                                          | —                            | ★                                                          | —                                                           | ★                        | ★                                                         | —                                               | 5                          |
| Gaard [29], 1997                                 | ★                                              | ★                                          | ★                            | ★                                                          | ★★                                                          | ★                        | ★                                                         | ★                                               | 9                          |

|                      |   |   |   |   |    |   |   |   |   |
|----------------------|---|---|---|---|----|---|---|---|---|
| Chyou [34], 1996     | ★ | ★ | ★ | ★ | —  | ★ | ★ | ★ | 7 |
| Schatzkin [35], 1988 | ★ | ★ | ★ | ★ | ★★ | ★ | ★ | ★ | 9 |
| Tornberg [27], 1986  | ★ | ★ | ★ | ★ | —  | ★ | ★ | — | 6 |
| Sidney [36], 1986    | ★ | ★ | ★ | ★ | ★  | ★ | ★ | ★ | 8 |

\* Studies that controlled for body mass index received one star, whereas studies that controlled for other important confounders such as cigarette smoking, alcohol drinking, received an additional star.

\*\* The study with a follow-up time >10 y was assigned one star.

\*\*\* The study with a follow-up rate >75% was assigned one star.

**Supplementary Table S4.** Subgroup analysis of the correlation between total cholesterol concentrations and colorectal cancer risk

|                                   | No. of studies | Summary RR (95% CIs) | I <sup>2</sup> Value (%) | P <sub>h</sub> * | P <sub>h</sub> ** |
|-----------------------------------|----------------|----------------------|--------------------------|------------------|-------------------|
| <b>Overall</b>                    |                |                      |                          |                  |                   |
| Colorectal cancer                 | 15             | 1.15 (1.08-1.22)     | 36.8                     | 0.017            |                   |
| Colon cancer                      | 7              | 1.08 (0.98-1.19)     | 44.1                     | 0.057            |                   |
| Rectal cancer                     | 7              | 1.15 (1.05-1.26)     | 19.4                     | 0.259            |                   |
| <b>Subgroup analyses</b>          |                |                      |                          |                  |                   |
| Study quality                     |                |                      |                          |                  | 0.679             |
| Medium                            | 3              | 1.18 (0.99-1.41)     | 54.7                     | 0.031            |                   |
| High                              | 12             | 1.14 (1.06-1.21)     | 31.3                     | 0.062            |                   |
| Number of cases                   |                |                      |                          |                  | 0.805             |
| < 338                             | 7              | 1.32 (1.14-1.52)     | 0                        | 0.532            |                   |
| ≥ 338                             | 8              | 1.11 (1.04-1.20)     | 46.6                     | 0.010            |                   |
| Follow-up years                   |                |                      |                          |                  | 0.416             |
| < 13                              | 6              | 1.12 (1.05-1.19)     | 20.0                     | 0.206            |                   |
| ≥ 13                              | 9              | 1.22 (1.07-1.40)     | 51.2                     | 0.012            |                   |
| Geographic location               |                |                      |                          |                  | 0.143             |
| North America                     | 4              | 0.96 (0.76-1.21)     | 33.5                     | 0.185            |                   |
| Europe                            | 8              | 1.20 (1.06-1.36)     | 49.7                     | 0.011            |                   |
| Asia                              | 3              | 1.14 (1.08-1.20)     | 0                        | 0.717            |                   |
| Gender                            |                |                      |                          |                  | 0.107             |
| Male                              | 9              | 1.10 (0.99-1.23)     | 49.2                     | 0.016            |                   |
| Female                            | 8              | 1.22 (1.11-1.34)     | 0                        | 0.962            |                   |
| <b>Adjustment for confounders</b> |                |                      |                          |                  |                   |
| Body mass index                   |                |                      |                          |                  | 0.553             |
| Yes                               | 10             | 1.13 (1.04-1.22)     | 32.5                     | 0.064            |                   |
| No                                | 5              | 1.18 (1.06-1.31)     | 45.0                     | 0.052            |                   |
| Alcohol drinking                  |                |                      |                          |                  | 0.196             |
| Yes                               | 9              | 1.11 (1.01-1.23)     | 40.3                     | 0.033            |                   |
| No                                | 6              | 1.18 (1.09-1.28)     | 28.2                     | 0.147            |                   |
| Cigarette smoking                 |                |                      |                          |                  | 0.553             |
| Yes                               | 10             | 1.13 (1.04-1.22)     | 32.5                     | 0.064            |                   |
| No                                | 5              | 1.18 (1.06-1.31)     | 45.0                     | 0.052            |                   |
| Physical activity                 |                |                      |                          |                  | 0.304             |
| Yes                               | 7              | 1.10 (0.98-1.23)     | 57.0                     | 0.008            |                   |
| No                                | 8              | 1.18 (1.10-1.27)     | 13.8                     | 0.273            |                   |
| Dietary factors                   |                |                      |                          |                  | 0.634             |
| Yes                               | 8              | 1.13 (0.94-1.37)     | 51.8                     | 0.008            |                   |
| No                                | 7              | 1.15 (1.09-1.21)     | 19.2                     | 0.220            |                   |
| Two aforementioned confounders    |                |                      |                          |                  | 0.553             |
| Yes                               | 10             | 1.13 (1.04-1.22)     | 32.5                     | 0.064            |                   |
| No                                | 5              | 1.18 (1.06-1.31)     | 45.0                     | 0.052            |                   |
| Three aforementioned confounders  |                |                      |                          |                  | 0.348             |
| Yes                               | 9              | 1.11 (1.01-1.23)     | 40.3                     | 0.033            |                   |
| No                                | 6              | 1.18 (1.09-1.28)     | 28.2                     | 0.147            |                   |

CI: confidence interval; N/A: not available; RR: relative risk;

\*P value for heterogeneity within each subgroup.

\*\*P value for heterogeneity between subgroups with meta-regression analysis.

**Supplementary Table S5.** Subgroup analysis of the correlation between high-density lipoprotein cholesterol concentrations and colorectal cancer risk

|                                   | No. of studies | Summary RR (95% CIs) | I <sup>2</sup> Value (%) | P <sub>h</sub> * | P <sub>h</sub> ** |
|-----------------------------------|----------------|----------------------|--------------------------|------------------|-------------------|
| <b>Overall</b>                    |                |                      |                          |                  |                   |
| Colorectal cancer                 | 11             | 0.86 (0.77-0.97)     | 28.8                     | 0.117            |                   |
| Colon cancer                      | 3              | 0.85 (0.55-1.30)     | 70.8                     | 0.008            |                   |
| Rectal cancer                     | 3              | 0.89 (0.65-1.22)     | 0                        | 0.409            |                   |
| <b>Subgroup analyses</b>          |                |                      |                          |                  |                   |
| Study quality                     |                |                      |                          |                  | 0.351             |
| Medium                            | 1              | 0.60 (0.30-1.20)     | N/A                      | N/A              |                   |
| High                              | 10             | 0.87 (0.77-0.98)     | 29.1                     | 0.120            |                   |
| Number of cases                   |                |                      |                          |                  | 0.770             |
| < 338                             | 6              | 0.88 (0.75-1.04)     | 9.3                      | 0.357            |                   |
| ≥ 338                             | 5              | 0.84 (0.70-1.01)     | 47.7                     | 0.054            |                   |
| Follow-up years                   |                |                      |                          |                  | 0.273             |
| < 13                              | 5              | 0.79 (0.62-1.01)     | 52.2                     | 0.033            |                   |
| ≥ 13                              | 6              | 0.93 (0.85-1.01)     | 0                        | 0.763            |                   |
| Geographic location               |                |                      |                          |                  | 0.421             |
| North America                     | 3              | 0.75 (0.60-0.94)     | 0                        | 0.447            |                   |
| Europe                            | 6              | 0.87 (0.73-1.02)     | 38.9                     | 0.090            |                   |
| Asia                              | 2              | 0.96 (0.75-1.23)     | 9.6                      | 0.351            |                   |
| Gender                            |                |                      |                          |                  | 0.476             |
| Male                              | 4              | 0.98 (0.80-1.21)     | 0                        | 0.543            |                   |
| Female                            | 4              | 0.88 (0.71-1.09)     | 0                        | 0.478            |                   |
| <b>Adjustment for confounders</b> |                |                      |                          |                  |                   |
| Body mass index                   |                |                      |                          |                  | 0.701             |
| Yes                               | 7              | 0.84 (0.71-0.99)     | 42.1                     | 0.061            |                   |
| No                                | 4              | 0.89 (0.74-1.07)     | 4.6                      | 0.392            |                   |
| Alcohol drinking                  |                |                      |                          |                  | 0.196             |
| Yes                               | 9              | 0.86 (0.74-0.98)     | 42.9                     | 0.045            |                   |
| No                                | 2              | 0.88 (0.65-1.18)     | 0                        | 0.645            |                   |
| Cigarette smoking                 |                |                      |                          |                  | 0.351             |
| Yes                               | 10             | 0.87 (0.77-0.98)     | 29.1                     | 0.120            |                   |
| No                                | 1              | 0.60 (0.30-1.20)     | N/A                      | N/A              |                   |
| Physical activity                 |                |                      |                          |                  | 0.249             |
| Yes                               | 8              | 0.80 (0.68-0.96)     | 53.0                     | 0.024            |                   |
| No                                | 3              | 0.96 (0.80-1.16)     | 0                        | 0.700            |                   |
| Dietary factors                   |                |                      |                          |                  | 0.242             |
| Yes                               | 5              | 0.77 (0.58-1.02)     | 60.6                     | 0.019            |                   |
| No                                | 5              | 0.92 (0.85-1.00)     | 0                        | 0.747            |                   |
| Two aforementioned confounders    |                |                      |                          |                  | 0.351             |
| Yes                               | 10             | 0.87 (0.77-0.98)     | 29.1                     | 0.120            |                   |
| No                                | 1              | 0.60 (0.30-1.20)     | N/A                      | N/A              |                   |
| Three aforementioned confounders  |                |                      |                          |                  | 0.409             |
| Yes                               | 7              | 0.82 (0.69-0.97)     | 55.4                     | 0.022            |                   |
| No                                | 4              | 0.93 (0.78-1.12)     | 0                        | 0.619            |                   |

CI: confidence interval; N/A: not available; RR: relative risk;

\*P value for heterogeneity within each subgroup.

\*\*P value for heterogeneity between subgroups with meta-regression analysis.

**Supplementary Table S6.** Subgroup analysis of the correlation between low-density lipoprotein cholesterol concentrations and colorectal cancer risk

|                                   | No. of studies | Summary RR (95% CIs) | I <sup>2</sup> Value (%) | P <sub>h</sub> * | P <sub>h</sub> ** |
|-----------------------------------|----------------|----------------------|--------------------------|------------------|-------------------|
| <b>Overall</b>                    |                |                      |                          |                  |                   |
| Colorectal cancer                 | 5              | 1.03 (0.75-1.41)     | 69.4                     | 0.001            |                   |
| Colon cancer                      | 2              | 0.85 (0.62-1.15)     | 0                        | 0.469            |                   |
| Rectal cancer                     | 2              | 0.87 (0.49-1.55)     | 59.6                     | 0.084            |                   |
| <b>Subgroup analyses</b>          |                |                      |                          |                  |                   |
| Study quality                     |                |                      |                          |                  | N/A               |
| Medium                            | 1              | 0.50 (0.29-0.87)     | N/A                      | N/A              |                   |
| High                              | 4              | 1.11 (0.81-1.53)     | 65.3                     | 0.003            |                   |
| Number of cases                   |                |                      |                          |                  | N/A               |
| < 338                             | 3              | 1.26 (0.67-2.40)     | 83.6                     | 0.000            |                   |
| ≥ 338                             | 2              | 0.84 (0.64-1.11)     | 23.4                     | 0.258            |                   |
| Follow-up years                   |                |                      |                          |                  | 0.062             |
| < 13                              | 2              | 0.68 (0.52-0.89)     | 0                        | 0.442            |                   |
| ≥ 13                              | 3              | 1.28 (0.88-1.87)     | 63.3                     | 0.012            |                   |
| Geographic location               |                |                      |                          |                  | N/A               |
| North America                     | 2              | 0.77 (0.35-1.73)     | 82.6                     | 0.017            |                   |
| Europe                            | 3              | 1.12 (0.77-1.63)     | 69.4                     | 0.002            |                   |
| Asia                              | 0              | N/A                  | N/A                      | N/A              |                   |
| Gender                            |                |                      |                          |                  | N/A               |
| Male                              | 2              | 1.17 (0.47-2.87)     | 85.3                     | 0.001            |                   |
| Female                            | 3              | 1.33 (1.01-1.76)     | 0                        | 0.566            |                   |
| <b>Adjustment for confounders</b> |                |                      |                          |                  |                   |
| Body mass index                   |                |                      |                          |                  | N/A               |
| Yes                               | 4              | 1.11 (0.81-1.53)     | 65.3                     | 0.003            |                   |
| No                                | 1              | 0.50 (0.29-0.87)     | N/A                      | N/A              |                   |
| Alcohol drinking                  |                |                      |                          |                  | N/A               |
| Yes                               | 3              | 1.20 (0.78-1.87)     | 76.1                     | 0.002            |                   |
| No                                | 2              | 0.84 (0.54-1.32)     | 56.2                     | 0.058            |                   |
| Cigarette smoking                 |                |                      |                          |                  | N/A               |
| Yes                               | 4              | 1.11 (0.81-1.53)     | 65.3                     | 0.003            |                   |
| No                                | 1              | 0.50 (0.29-0.87)     | N/A                      | N/A              |                   |
| Physical activity                 |                |                      |                          |                  | N/A               |
| Yes                               | 4              | 1.05 (0.68-1.62)     | 78.9                     | 0.000            |                   |
| No                                | 1              | 0.98 (0.61-1.58)     | N/A                      | N/A              |                   |
| Dietary factors                   |                |                      |                          |                  | N/A               |
| Yes                               | 3              | 1.20 (0.78-1.87)     | 76.1                     | 0.002            |                   |
| No                                | 2              | 0.84 (0.54-1.32)     | 56.2                     | 0.058            |                   |
| Two aforementioned confounders    |                |                      |                          |                  | N/A               |
| Yes                               | 4              | 1.11 (0.81-1.53)     | 65.3                     | 0.003            |                   |
| No                                | 1              | 0.50 (0.29-0.87)     | N/A                      | N/A              |                   |
| Three aforementioned confounders  |                |                      |                          |                  | N/A               |
| Yes                               | 3              | 1.20 (0.78-1.87)     | 76.1                     | 0.002            |                   |
| No                                | 2              | 0.84 (0.54-1.32)     | 56.2                     | 0.058            |                   |

CI: confidence interval; N/A: not available; RR: relative risk;

\*P value for heterogeneity within each subgroup.

\*\*P value for heterogeneity between subgroups with meta-regression analysis.



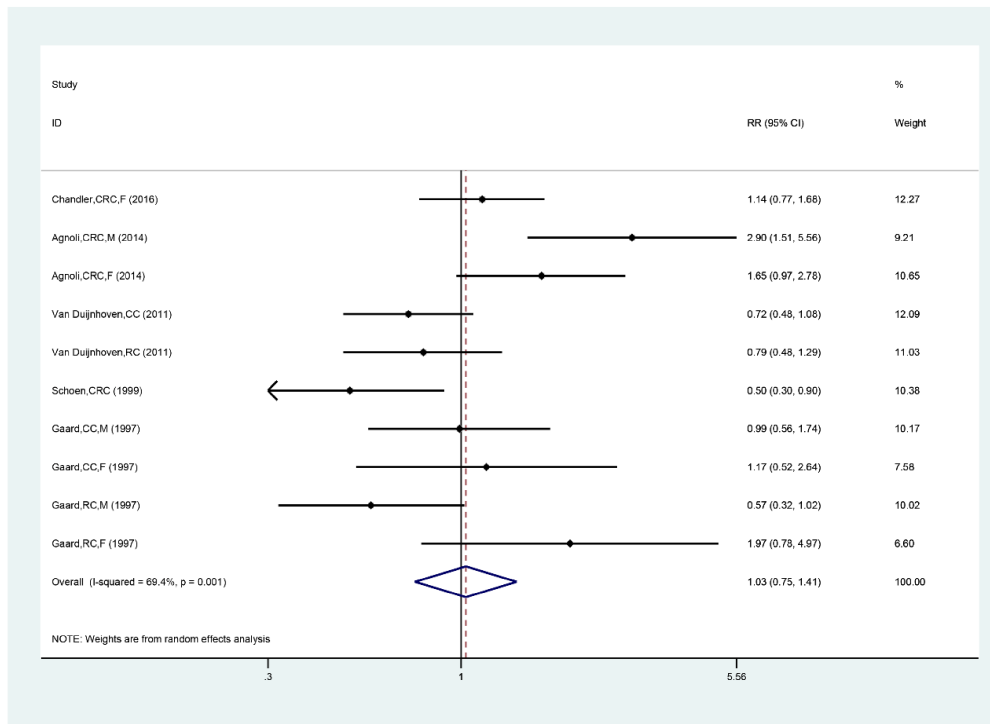

Supplementary Figure 1 Forest plots on the association between low-density lipoprotein cholesterol concentrations and colorectal cancer risk
